# Supplementary material for: Routine Surveillance of Healthcare-Associated Infections Misses a Significant Proportion of Invasive Aspergillosis in Patients with Severe COVID-19
Source: MDPI journal article supplement (doi:10.3390/jof8030273), 2022-03-08
Supplement: s1 [file s1]

1. HAI-ICU

X-ray

Two or more serial chest X-rays or CT-scans with a suggestive image of pneumonia for patients with underlying cardiac or pulmonary disease\* (in patients without underlying cardiac or pulmonary disease, one definitive chest X-ray or CT-scan is sufficient).

Symptoms

and at least one of the following:

- fever  $> 38^{\circ}\text{C}$  with no other cause
- leukopenia ( $< 4\,000\text{ WBC/mm}^3$ ) or leucocytosis ( $\geq 12\,000\text{ WBC/mm}^3$ ).

and at least one of the following (or at least two, if clinical pneumonia only = PN 4 and PN 5):

- new onset of purulent sputum, or change in character of sputum (colour, odour, quantity, consistency)
- cough or dyspnoea or tachypnea
- suggestive auscultation (rales or bronchial breath sounds), rhonchi, wheezing
- worsening gas exchange (e.g.  $\text{O}_2$  desaturation or increased oxygen requirements or increased ventilation demand)

and according to the used diagnostic method:

Microbiology

a) Bacteriologic diagnostic performed by:

Positive quantitative culture from minimally contaminated LRT specimen (PN 1)

- bronchoalveolar lavage (BAL) with a threshold of  $\geq 10^4$  colony forming units (CFU)/ml or  $\geq 5\%$  of BAL obtained cells contain intracellular bacteria on direct microscopic exam (classified on the diagnostic category BAL)
- protected brush (PB Wimberley) with a threshold of  $\geq 10^3$  CFU/ml
- distal protected aspirate (DPA) with a threshold of  $\geq 10^3$  CFU/ml.

Positive quantitative culture from possibly contaminated LRT specimen (PN 2)

- Quantitative culture of LRT specimen (e.g. endotracheal aspirate) with a threshold of  $10^6$  CFU/ml.

b) Alternative microbiology methods (PN 3)

- positive blood culture not related to another source of infection
- positive growth in culture of pleural fluid
- pleural or pulmonary abscess with positive needle aspiration
- histologic pulmonary exam shows evidence of pneumonia

- positive exams for pneumonia with virus or particular germs (e.g. Legionella, Aspergillus, mycobacteria, mycoplasma, *Pneumocystis jiroveci* [previously *P. carinii*]):
- positive detection of viral antigen or antibody from respiratory secretions (e.g. EIA, FAMA, shell vial assay, PCR)
- positive direct exam or positive culture from bronchial secretions or tissue
- seroconversion (example: influenza viruses, Legionella, Chlamydia)
- detection of antigens in urine (Legionella).

c) Others

- positive sputum culture or non-quantitative LRT specimen culture (PN 4)
- no positive microbiology (PN 5).

2. EORTC/MSG

**Proven**

Microscopic Analysis: Sterile Material: Histopathologic, cytopathologic, or direct microscopic examination of a specimen obtained by needle aspiration or biopsy in which hyphae or melanized yeast-like forms are seen accompanied by evidence of associated tissue damage

or

Culture: Sterile Material: Recovery of a hyaline or pigmented mold by culture of a specimen obtained by a sterile procedure from a normally sterile and clinically or radiologically abnormal site consistent with an infectious disease process, excluding BAL fluid, a paranasal or mastoid sinus cavity specimen, and urine

or

Blood: Blood culture that yields a mold (eg, *Fusarium* species) in the context of a compatible infectious disease process

or

Tissue Nucleic Acid Diagnosis: Amplification of fungal DNA by PCR combined with DNA sequencing when molds are seen in formalin-fixed paraffin-embedded tissue

**Probable**

At least one of the following host factors

- Recent history of neutropenia ( $<0.5 \times 10^9$  neutrophils/L [ $<500$  neutrophils/mm<sup>3</sup>] for  $>10$  days) temporally related to the onset of invasive fungal disease
- Hematologic malignancy
- Receipt of an allogeneic stem cell transplant
- Receipt of a solid organ transplant

- Prolonged use of corticosteroids (excluding among patients with allergic bronchopulmonary aspergillosis) at a therapeutic dose of  $\geq 0.3$  mg/kg corticosteroids for  $\geq 3$  weeks in the past 60 days
- Treatment with other recognized T-cell immunosuppressants, such as calcineurin inhibitors, tumor necrosis factor- $\alpha$  blockers, lymphocytespecific monoclonal antibodies, immunosuppressive nucleoside analogues during the past 90 days
- Treatment with recognized B-cell immunosuppressants, such as Bruton's tyrosine kinase inhibitors, eg, ibrutinib
- Inherited severe immunodeficiency (such as chronic granulomatous disease, STAT 3 deficiency, or severe combined immunodeficiency)
- Acute graft-versus-host disease grade III or IV involving the gut, lungs, or liver that is refractory to first-line treatment with steroids

At least one of the following clinical features

*Pulmonary aspergillosis*

One of the following patterns on CT:

- Dense, well-circumscribed lesions(s) with or without a halo sign
- Air crescent sign
- Cavity
- Wedge-shaped and segmental or lobar consolidation

Other pulmonary mold diseases

As for pulmonary aspergillosis but also including a reverse halo sign

*Tracheobronchitis*

- Tracheobronchial ulceration, nodule, pseudomembrane, plaque, or eschar seen on bronchoscopic analysis

*Sino-nasal diseases*

- Acute localized pain (including pain radiating to the eye)
- Nasal ulcer with black eschar
- Extension from the paranasal sinus across bony barriers, including into the orbit

*Central nervous system infection*

One of the following signs:

- Focal lesions on imaging
- Meningeal enhancement on magnetic resonance imaging or CT

At least one of the following mycological evidence

Any mold, for example, *Aspergillus*, *Fusarium*, *Scedosporium* species or *Mucorales* recovered by culture from sputum, BAL, bronchial brush, or aspirate

Microscopical detection of fungal elements in sputum, BAL, bronchial brush, or aspirate indicating a mold

#### *Tracheobronchitis*

- Aspergillus recovered by culture of BAL or bronchial brush
- Microscopic detection of fungal elements in BAL or bronchial brush indicating a mold

#### *Sino-nasal diseases*

- Mold recovered by culture of sinus aspirate samples
- Microscopic detection of fungal elements in sinus aspirate samples indicating a mold

#### *Aspergillosis only*

Galactomannan antigen detected in plasma, serum, BAL, or CSF of any of the following thresholds:

- Single serum or plasma:  $\geq 1.0$
- BAL fluid:  $\geq 1.0$
- Single serum or plasma:  $\geq 0.7$  and BAL fluid  $\geq 0.8$

### **3. BM-AspICU**

Entry criterion: admittance to ICU and one of the following

- Positive Aspergillus in the lower respiratory tract
- Imaging sign (CT or X-Ray)
  - Air-crescent sign
  - Cavity
  - Dense, well-circumscribed lesion(s) with or without halo sign
  - Diffuse reticular and alveolar opacities
  - Nonspecific infiltrates and consolidation
  - Pleural fluid
  - Wedge-shaped infiltrate
  - Tree-in-bud pattern
- Clinical sign
  - Fever refractory to > 3 days of antibiotherapy
  - Pleuritic chest pain
  - Dyspnoea
  - Hemoptysis
  - Respiratory insufficiency despite ventilation support

**Proven** see EORTC

#### **Probable**

At least one EORTC/MSG host factor (see above) and at least one imaging sign (see above) and at least one of the following mycological signs

- Positive direct examination showing hyphae

- Positive Aspergillus culture in BALF
- Positive Aspergillus culture in lower respiratory tract specimen
- Fungal biomarkers
- BALF galactomannan
- BALF Aspergillus qPCR
- Serum/plasma galactomannan
- Serum/plasma Aspergillus qPCR

or

at least one of the following:

- Chronic obstructive pulmonary disease
- Viral respiratory diseases (influenza infection, SARS-CoV2 infection, etc.)
- Cirrhosis, hepatic insufficiency
- Other (diabetes, chronic alcohol abuse, chronic diseases, cardiac surgery, etc.)

and at least one imaging sign and at least two mycological signs and at least one clinical sign (see above)

#### **Possible**

At least one EORTC/MSG host factor and at least one clinical sign.

#### **4. IAPA**

Entry criteria: influenza-like illness + positive influenza PCR or antigen + temporally relationship

##### Aspergillus tracheobronchitis

**Proven** Biopsy or brush specimen of airway plaque, pseudomembrane or ulcer showing hyphal elements and Aspergillus growth on culture or positive Aspergillus PCR in tissue

**Probable** Airway plaque, pseudomembrane or ulcer

and at least one of the following:

- Serum GM index > 0.5
- BAL GM index  $\geq$  1.0
- Positive BAL culture
- Positive tracheal aspirate culture
- Positive sputum culture
- Hyphae consistent with Aspergillus

##### IAPA in patients without documented Aspergillus tracheobronchitis

**Proven** Lung biopsy showing invasive fungal elements and Aspergillus growth on culture or positive Aspergillus PCR in tissue

**Probable** A: Pulmonary infiltrate

and at least one of the following:

- Serum GM index  $> 0.5$
- BAL GM index  $\geq 1.0$
- Positive BAL culture

or

B: Cavitating infiltrate (not attributed to another cause)

and at least one of the following:

- Positive sputum culture
- Positive tracheal aspirate culture

## 5. CAPA

Entry criterion: Patient with COVID-19 needing intensive care and a temporal relationship

**Proven** Tracheobronchitis or other pulmonary form

and at least one of the following:

- histopathological or direct microscopic detection of fungal hyphae, showing invasive growth with associated tissue damage
- aspergillus recovered by culture
- microscopy or histology or PCR obtained by a sterile aspiration or biopsy from a pulmonary site, showing an infectious disease process

**Probable**

### Tracheobronchitis

tracheobronchial ulceration, nodule, pseudomembrane, plaque, or eschar seen on bronchoscopic analysis

and at least one of the following: microscopic

- detection of fungal elements in bronchoalveolar lavage, indicating a mould
- positive bronchoalveolar lavage culture or PCR
- serum galactomannan index  $> 0.5$
- serum LFA index  $> 0.5$
- bronchoalveolar lavage galactomannan index  $\geq 1.0$
- bronchoalveolar lavage LFA index  $\geq 1.0$

### Other pulmonary forms

Pulmonary infiltrate, preferably documented by chest CT, or cavitating infiltrate (not attributed to another cause)

and at least one of the following:

- Microscopic detection of fungal elements in bronchoalveolar lavage, indicating a mould
- positive bronchoalveolar lavage culture

- serum galactomannan index  $>0.5$
- serum LFA index  $>0.5$
- bronchoalveolar lavage galactomannan index  $\geq 1.0$
- bronchoalveolar lavage LFA index  $\geq 1.0$
- two or more positive aspergillus PCR tests in plasma, serum, or whole blood
- a single positive aspergillus PCR in bronchoalveolar lavage fluid ( $<36$  cycles)
- a single positive aspergillus PCR in plasma, serum, or whole blood, and a single positive in bronchoalveolar lavage fluid (any threshold cycle permitted)

**Possible** Pulmonary infiltrate, preferably documented by chest CT, or cavitating infiltrate (not attributed to another cause)

and at least one of the following:

- microscopic detection of fungal elements in non-bronchoscopic lavage indicating a mould
- positive non-bronchoscopic lavage culture
- single non-bronchoscopic lavage galactomannan index  $>4.5$
- non-bronchoscopic lavage galactomannan index  $>1.2$  twice or more
- non-bronchoscopic lavage galactomannan index  $>1.2$  plus another non-bronchoscopic lavage mycology test positive (non-bronchoscopic lavage PCR or LFA)
